# Supplementary material
Source: publisher site journal article supplement (http://www.kjim.org/upload/media/kjim-2022-369-Supplementary-Table-1.pdf)
Supplement: Supplementary file 1 [file kjim-2022-369-Supplementary-Table-1.pdf]

**Supplementary Table 1. Severe adverse events in RA patients who used targeted therapy for 24 weeks**

| Category                                | JAKi (n = 196) |                       | bDMARD (n = 150) |                 |
|-----------------------------------------|----------------|-----------------------|------------------|-----------------|
|                                         | Events, n      | Patients, n (%)       | Events, n        | Patients, n (%) |
| SAE                                     | 10             | 9 (4.6)               | 6                | 6 (4.0)         |
| Cardiac arrest                          | 1              | 1 (0.5)               | 0                | 0 (0)           |
| Back pain                               | 1              | 1 (0.5)               | 0                | 0 (0)           |
| Fracture                                | 2              | 2 (1.0) <sup>a)</sup> | 0                | 0 (0)           |
| Enterocolitis                           | 2              | 2 (1.0) <sup>a)</sup> | 0                | 0 (0)           |
| Fever                                   | 1              | 1 (0.5)               | 0                | 0 (0)           |
| Avascular necrosis                      | 1              | 1 (0.5)               | 0                | 0 (0)           |
| Gallbladder obstruction                 | 1              | 1 (0.5)               | 0                | 0 (0)           |
| Pneumonia                               | 1              | 1 (0.5)               | 1                | 1 (0.7)         |
| Cubital tunnel syndrome                 | 0              | 0 (0)                 | 1                | 1 (0.7)         |
| Nontuberculous mycobacteria aggravation | 0              | 0 (0)                 | 1                | 1 (0.7)         |
| Acute hepatitis                         | 0              | 0 (0)                 | 1                | 1 (0.7)         |
| Myoma of uterus                         | 0              | 0 (0)                 | 1                | 1 (0.7)         |
| Mediastinal mass                        | 0              | 0 (0)                 | 1                | 1 (0.7)         |

RA, rheumatoid arthritis; JAKi, Janus kinase inhibitors; bDMARD, biologic disease modifying anti-rheumatic drugs; SAE, severe adverse event.

<sup>a)</sup>One patient was reported two events such as fracture and enterocolitis.
